# Supplementary material
Source: Research Square preprint supplement (doi:10.21203/rs.3.rs-9247960/v1)
Supplement: Supplementary file 1 [file bcc3b0551bda7caf44dee7f7.pdf]

## Supplementary information

Table S1. Corine Land Cover ecosystem typology with crosswalk to MAES (Mapping and Assessment of Ecosystems and their Services) ecosystem typology.

| CLC level 1             | CLC level 2                                  | CLC level 3                                                                                | MAES ecosystem type |
|-------------------------|----------------------------------------------|--------------------------------------------------------------------------------------------|---------------------|
| Artificial surfaces     | Urban fabric                                 | 111 Continuous urban fabric                                                                | Urban               |
|                         |                                              | 112 Discontinuous urban fabric                                                             |                     |
|                         | Industrial, commercial and transport units   | 121 Industrial or commercial units                                                         |                     |
|                         |                                              | 122 Road and rail networks and associated land                                             |                     |
|                         |                                              | 123 Port areas                                                                             |                     |
|                         |                                              | 124 Airports                                                                               |                     |
|                         | Mine, dump and construction sites            | 131 Mineral extraction sites                                                               |                     |
|                         |                                              | 132 Dump sites                                                                             |                     |
|                         |                                              | 133 Construction sites                                                                     |                     |
|                         | Artificial, non-agricultural vegetated areas | 141 Green urban areas                                                                      |                     |
|                         |                                              | 142 Sport and leisure facilities                                                           |                     |
| Agricultural areas      | Arable land                                  | 211 Non-irrigated arable land                                                              | Cropland            |
|                         |                                              | 212 Permanently irrigated land                                                             |                     |
|                         |                                              | 213 Rice fields                                                                            |                     |
|                         | Permanent crops                              | 221 Vineyards                                                                              |                     |
|                         |                                              | 222 Fruit trees and berry plantations                                                      |                     |
|                         |                                              | 223 Olive groves                                                                           |                     |
|                         | Pastures                                     | 231 Pastures                                                                               |                     |
|                         | Heterogeneous agricultural areas             | 241 Annual crops associated with permanent crops                                           | Cropland            |
|                         |                                              | 242 Complex cultivation patterns                                                           |                     |
|                         |                                              | 243 Land principally occupied by agriculture, with significant areas of natural vegetation |                     |
| 244 Agro-forestry areas |                                              |                                                                                            |                     |

|                               |                                                 |                                 |                                       |
|-------------------------------|-------------------------------------------------|---------------------------------|---------------------------------------|
| Forest and semi natural areas | Forests                                         | 311 Broad-leaved forest         | Woodland and forest                   |
|                               |                                                 | 312 Coniferous forest           |                                       |
|                               |                                                 | 313 Mixed forest                |                                       |
|                               | Scrub and/or herbaceous vegetation associations | 321 Natural grasslands          | Grassland                             |
|                               |                                                 | 322 Moors and heathland         | Heathland and shrub                   |
|                               |                                                 | 323 Sclerophyllous vegetation   |                                       |
|                               |                                                 | 324 Transitional woodland-shrub | Woodland and forest                   |
|                               | Open spaces with little or no vegetation        | 331 Beaches, dunes, sands       | Sparsely vegetated land               |
|                               |                                                 | 332 Bare rocks                  |                                       |
|                               |                                                 | 333 Sparsely vegetated areas    |                                       |
|                               |                                                 | 334 Burnt areas                 |                                       |
|                               |                                                 | 335 Glaciers and perpetual snow |                                       |
|                               | Wetlands                                        | Inland wetlands                 | 411 Inland marshes                    |
| 412 Peat bogs                 |                                                 |                                 |                                       |
| Maritime wetlands             |                                                 | 421 Salt marshes                | Marine inlets and transitional waters |
|                               |                                                 | 422 Salines                     |                                       |
|                               |                                                 | 423 Intertidal flats            |                                       |
| Water bodies                  | Inland waters                                   | 511 Water courses               | Rivers and lakes                      |
|                               |                                                 | 512 Water bodies                |                                       |
|                               | Marine waters                                   | 521 Coastal lagoons             | Marine inlets and transitional waters |
|                               |                                                 | 522 Estuaries                   |                                       |
|                               |                                                 | 523 Sea and ocean               |                                       |

Table S2. Natural habitat net change per country by coastal, riparian and inland areas. The accounting table shows the net change defined as consumption (loss) subtract formation (gain) of nature in square kilometres and as a percentage of baseline nature area within the given land-water zone. Figures are divided into changes in nature to/from urban (“u”) and cropland (“c”) land uses.

|     |                    | Inland nature          | Coastal nature          | Riparian nature         | Total nature              |
|-----|--------------------|------------------------|-------------------------|-------------------------|---------------------------|
| ALB | per year (km2)     | -1.1 (u: -1.3; c: 0.2) | -0.5 (u: -0.5; c: 0)    | -1.1 (u: -0.6; c: -0.5) | -2.7 (u: -2.4; c: -0.3)   |
|     | % of baseline area | -0.1 (u: -0.1; c: 0)   | -2.5 (u: -2.6; c: 0.1)  | -0.9 (u: -0.5; c: -0.4) | -3.6 (u: -3.2; c: -0.3)   |
| AUT | per year (km2)     | -4.1 (u: -4.1; c: 0)   | 0 (u: 0; c: 0)          | -0.9 (u: -0.9; c: 0)    | -5 (u: -5.1; c: 0.1)      |
|     | % of baseline area | -0.2 (u: -0.2; c: 0)   | 0 (u: 0; c: 0)          | -0.2 (u: -0.2; c: 0)    | -0.4 (u: -0.4; c: 0)      |
| BEL | per year (km2)     | -0.7 (u: -0.7; c: 0)   | -0.2 (u: -0.3; c: 0.1)  | -0.1 (u: -0.3; c: 0.2)  | -1 (u: -1.2; c: 0.2)      |
|     | % of baseline area | -0.1 (u: -0.1; c: 0)   | -9 (u: -11.1; c: 2.2)   | -0.2 (u: -0.4; c: 0.3)  | -9.3 (u: -11.7; c: 2.4)   |
| BGR | per year (km2)     | -12 (u: -2.3; c: -9.7) | -0.2 (u: -0.1; c: -0.1) | -1.9 (u: -0.3; c: -1.7) | -14.1 (u: -2.7; c: -11.5) |

|     |                    |                            |                         |                         |                            |
|-----|--------------------|----------------------------|-------------------------|-------------------------|----------------------------|
|     | % of baseline area | -0.5 (u: -0.1; c: -0.4)    | -1.6 (u: -1; c: -0.6)   | -0.9 (u: -0.1; c: -0.8) | -2.9 (u: -1.2; c: -1.8)    |
| BIH | per year (km2)     | -2.7 (u: -1.5; c: -1.2)    | 0 (u: 0; c: 0)          | -1.2 (u: -0.3; c: -0.9) | -3.9 (u: -1.8; c: -2.1)    |
|     | % of baseline area | -0.2 (u: -0.1; c: -0.1)    | 0 (u: 0; c: 0)          | -0.8 (u: -0.2; c: -0.6) | -0.9 (u: -0.3; c: -0.7)    |
| CHE | per year (km2)     | -0.2 (u: -0.2; c: 0)       | 0 (u: 0; c: 0)          | 0 (u: 0; c: 0)          | -0.3 (u: -0.3; c: 0)       |
|     | % of baseline area | 0 (u: 0; c: 0)             | 0 (u: 0; c: 0)          | 0 (u: 0; c: 0)          | 0 (u: 0; c: 0)             |
| CYP | per year (km2)     | -3.7 (u: -2.2; c: -1.5)    | -0.1 (u: -0.1; c: 0)    | 0 (u: 0; c: 0)          | -3.8 (u: -2.3; c: -1.5)    |
|     | % of baseline area | -1.7 (u: -1; c: -0.7)      | -2.9 (u: -2.9; c: 0)    | 0 (u: 0; c: 0)          | -4.5 (u: -3.8; c: -0.7)    |
| CZE | per year (km2)     | 74.3 (u: -1.1; c: 75.3)    | 0 (u: 0; c: 0)          | 3.5 (u: -0.1; c: 3.6)   | 77.8 (u: -1.2; c: 79)      |
|     | % of baseline area | 4.1 (u: -0.1; c: 4.2)      | 0 (u: 0; c: 0)          | 2.7 (u: -0.1; c: 2.8)   | 6.8 (u: -0.2; c: 6.9)      |
| DEU | per year (km2)     | -35.4 (u: -13.1; c: -22.3) | -1 (u: -0.6; c: -0.5)   | -5.7 (u: -1.8; c: -3.8) | -42 (u: -15.5; c: -26.6)   |
|     | % of baseline area | -0.4 (u: -0.2; c: -0.3)    | -1.2 (u: -0.7; c: -0.6) | -0.4 (u: -0.1; c: -0.3) | -2.1 (u: -0.9; c: -1.1)    |
| DNK | per year (km2)     | 1 (u: -0.1; c: 1.2)        | -0.2 (u: -0.3; c: 0.1)  | -0.1 (u: 0; c: 0)       | 0.8 (u: -0.4; c: 1.2)      |
|     | % of baseline area | 0.4 (u: 0; c: 0.4)         | -0.3 (u: -0.3; c: 0.1)  | -0.1 (u: -0.1; c: -0.1) | 0 (u: -0.4; c: 0.4)        |
| ESP | per year (km2)     | -69.5 (u: -27.2; c: -42.3) | -6.2 (u: -5.8; c: -0.4) | -7.8 (u: -4.7; c: -3.1) | -83.5 (u: -37.8; c: -45.7) |
|     | % of baseline area | -0.6 (u: -0.2; c: -0.3)    | -2.6 (u: -2.4; c: -0.2) | -0.5 (u: -0.3; c: -0.2) | -3.6 (u: -2.9; c: -0.7)    |
| EST | per year (km2)     | -4.4 (u: -3; c: -1.4)      | -0.3 (u: -0.5; c: 0.2)  | -1.2 (u: -0.3; c: -0.9) | -5.9 (u: -3.8; c: -2.2)    |
|     | % of baseline area | -0.3 (u: -0.2; c: -0.1)    | -0.3 (u: -0.6; c: 0.2)  | -1 (u: -0.2; c: -0.8)   | -1.6 (u: -1; c: -0.7)      |
| FIN | per year (km2)     | -38.6 (u: -8.9; c: -29.7)  | -1.5 (u: -1.2; c: -0.3) | -2.6 (u: -0.7; c: -1.9) | -42.6 (u: -10.7; c: -31.9) |
|     | % of baseline area | -0.3 (u: -0.1; c: -0.2)    | -0.5 (u: -0.4; c: -0.1) | -0.2 (u: -0.1; c: -0.1) | -0.9 (u: -0.5; c: -0.4)    |
| FRA | per year (km2)     | -38.5 (u: -25.5; c: -13)   | -1.7 (u: -1.7; c: 0)    | -3.8 (u: -3.7; c: -0.1) | -44 (u: -30.9; c: -13.1)   |
|     | % of baseline area | -0.3 (u: -0.2; c: -0.1)    | -1 (u: -1; c: 0)        | -0.2 (u: -0.2; c: 0)    | -1.5 (u: -1.4; c: -0.1)    |
| GBR | per year (km2)     | -22.3 (u: -22.7; c: 0.4)   | -1.1 (u: -1.3; c: 0.3)  | -1.3 (u: -1.6; c: 0.3)  | -24.7 (u: -25.6; c: 0.9)   |
|     | % of baseline area | -0.3 (u: -0.3; c: 0)       | -0.2 (u: -0.2; c: 0)    | -0.1 (u: -0.2; c: 0)    | -0.6 (u: -0.7; c: 0.1)     |
| GRC | per year (km2)     | -5.4 (u: -4.9; c: -0.5)    | -1.1 (u: -1; c: -0.1)   | -0.1 (u: -0.3; c: 0.2)  | -6.6 (u: -6.2; c: -0.4)    |
|     | % of baseline area | -0.2 (u: -0.1; c: 0)       | -0.3 (u: -0.2; c: 0)    | 0 (u: -0.1; c: 0.1)     | -0.5 (u: -0.5; c: 0.1)     |
| HRV | per year (km2)     | -10.9 (u: -5.8; c: -5.2)   | -1.5 (u: -0.8; c: -0.8) | -1.6 (u: -0.7; c: -0.9) | -14 (u: -7.2; c: -6.8)     |
|     | % of baseline area | -0.7 (u: -0.4; c: -0.3)    | -1 (u: -0.5; c: -0.5)   | -0.8 (u: -0.3; c: -0.5) | -2.4 (u: -1.2; c: -1.3)    |
| HUN | per year (km2)     | 35.3 (u: -1.4; c: 36.7)    | 0 (u: 0; c: 0)          | 8.7 (u: -0.6; c: 9.2)   | 44 (u: -1.9; c: 45.9)      |
|     | % of baseline area | 2.6 (u: -0.1; c: 2.7)      | 0 (u: 0; c: 0)          | 2.3 (u: -0.1; c: 2.4)   | 4.9 (u: -0.2; c: 5.1)      |
| IRL | per year (km2)     | 9.8 (u: -6.3; c: 16.1)     | 0.2 (u: -1.4; c: 1.6)   | -0.1 (u: -1.3; c: 1.2)  | 9.8 (u: -9.1; c: 18.9)     |
|     | % of baseline area | 0.4 (u: -0.2; c: 0.6)      | 0.1 (u: -0.6; c: 0.7)   | 0 (u: -0.5; c: 0.4)     | 0.4 (u: -1.3; c: 1.7)      |
| ISL | per year (km2)     | -2.9 (u: -2.4; c: -0.5)    | -1 (u: -1; c: 0)        | -0.4 (u: -0.3; c: -0.1) | -4.3 (u: -3.7; c: -0.6)    |
|     | % of baseline area | -0.1 (u: -0.1; c: 0)       | -0.4 (u: -0.4; c: 0)    | -0.1 (u: -0.1; c: 0)    | -0.5 (u: -0.5; c: 0)       |
| ITA | per year (km2)     | -4.1 (u: -2.5; c: -1.6)    | -0.3 (u: -0.5; c: 0.1)  | -3.4 (u: -0.5; c: -2.9) | -7.8 (u: -3.5; c: -4.3)    |
|     | % of baseline area | -0.1 (u: 0; c: 0)          | -0.3 (u: -0.4; c: 0.1)  | -0.4 (u: -0.1; c: -0.3) | -0.7 (u: -0.4; c: -0.2)    |
| LIE | per year (km2)     | 0 (u: 0; c: 0)             | 0 (u: 0; c: 0)          | 0 (u: 0; c: 0)          | 0 (u: 0; c: 0)             |
|     | % of baseline area | -0.1 (u: -0.1; c: 0)       | 0 (u: 0; c: 0)          | 0 (u: 0; c: 0)          | -0.1 (u: -0.1; c: 0)       |
| LTU | per year (km2)     | -20.2 (u: -0.8; c: -19.5)  | 0 (u: 0; c: 0)          | -1.8 (u: -0.1; c: -1.7) | -22 (u: -0.9; c: -21.1)    |
|     | % of baseline area | -1.4 (u: -0.1; c: -1.4)    | -0.4 (u: -0.3; c: -0.1) | -1.2 (u: -0.1; c: -1.1) | -3 (u: -0.4; c: -2.6)      |
| LUX | per year (km2)     | -0.3 (u: -0.2; c: -0.1)    | 0 (u: 0; c: 0)          | 0 (u: 0; c: 0)          | -0.3 (u: -0.2; c: -0.1)    |
|     | % of baseline area | -0.4 (u: -0.3; c: -0.1)    | 0 (u: 0; c: 0)          | -0.2 (u: -0.2; c: 0)    | -0.6 (u: -0.5; c: -0.1)    |
| LVA | per year (km2)     | -33.9 (u: -1.4; c: -32.5)  | -0.3 (u: 0; c: -0.3)    | -4.9 (u: -0.4; c: -4.4) | -39.1 (u: -1.9; c: -37.2)  |
|     | % of baseline area | -1.6 (u: -0.1; c: -1.5)    | -1.2 (u: -0.1; c: -1.1) | -2.1 (u: -0.2; c: -2)   | -4.9 (u: -0.3; c: -4.6)    |
| MKD | per year (km2)     | -0.2 (u: -0.7; c: 0.5)     | 0 (u: 0; c: 0)          | 0 (u: 0; c: 0.1)        | -0.2 (u: -0.7; c: 0.6)     |
|     | % of baseline area | 0 (u: -0.1; c: 0.1)        | 0 (u: 0; c: 0)          | 0 (u: 0; c: 0.1)        | 0 (u: -0.1; c: 0.1)        |
| MLT | per year (km2)     | 0 (u: 0; c: 0)             | 0 (u: 0; c: 0)          | 0 (u: 0; c: 0)          | 0 (u: 0; c: 0)             |

|     |                    |                             |                         |                         |                           |
|-----|--------------------|-----------------------------|-------------------------|-------------------------|---------------------------|
|     | % of baseline area | 0 (u: 0; c: 0)              | -0.7 (u: -0.7; c: 0)    | 0 (u: 0; c: 0)          | -0.7 (u: -0.7; c: 0)      |
| MNE | per year (km2)     | -0.7 (u: -0.6; c: -0.1)     | -0.2 (u: -0.2; c: 0)    | -0.2 (u: -0.2; c: 0)    | -1.1 (u: -0.9; c: -0.2)   |
|     | % of baseline area | -0.1 (u: -0.1; c: 0)        | -1.5 (u: -1.5; c: 0)    | -0.4 (u: -0.3; c: -0.1) | -2 (u: -1.9; c: -0.1)     |
| NLD | per year (km2)     | -3 (u: -7; c: 4)            | -0.3 (u: -0.8; c: 0.5)  | -2.9 (u: -5.6; c: 2.7)  | -6.1 (u: -13.3; c: 7.2)   |
|     | % of baseline area | -0.5 (u: -1.3; c: 0.7)      | -0.8 (u: -2.6; c: 1.7)  | -1.2 (u: -2.3; c: 1.1)  | -2.5 (u: -6.1; c: 3.6)    |
| NOR | per year (km2)     | -11.2 (u: -10.2; c: -1)     | -3.1 (u: -2.9; c: -0.1) | -2.2 (u: -1.8; c: -0.4) | -16.5 (u: -14.9; c: -1.6) |
|     | % of baseline area | -0.1 (u: -0.1; c: 0)        | -0.2 (u: -0.2; c: 0)    | -0.2 (u: -0.1; c: 0)    | -0.4 (u: -0.4; c: -0.1)   |
| POL | per year (km2)     | 14.3 (u: -9.5; c: 23.8)     | -0.1 (u: -0.1; c: 0)    | -1.1 (u: -1.6; c: 0.5)  | 13.1 (u: -11.2; c: 24.3)  |
|     | % of baseline area | 0.2 (u: -0.2; c: 0.4)       | -0.4 (u: -0.4; c: 0)    | -0.1 (u: -0.2; c: 0.1)  | -0.3 (u: -0.7; c: 0.4)    |
| PRT | per year (km2)     | 0.2 (u: -12.6; c: 12.8)     | -1.5 (u: -1.1; c: -0.3) | -0.7 (u: -1; c: 0.4)    | -2 (u: -14.8; c: 12.8)    |
|     | % of baseline area | 0 (u: -0.6; c: 0.6)         | -1.7 (u: -1.3; c: -0.4) | -0.2 (u: -0.3; c: 0.1)  | -1.9 (u: -2.2; c: 0.3)    |
| ROU | per year (km2)     | -12.7 (u: -3.7; c: -9)      | -0.5 (u: -0.1; c: -0.4) | -6.5 (u: -1; c: -5.4)   | -19.7 (u: -4.8; c: -14.9) |
|     | % of baseline area | -0.2 (u: -0.1; c: -0.2)     | -2.9 (u: -0.4; c: -2.4) | -0.9 (u: -0.1; c: -0.7) | -4 (u: -0.6; c: -3.3)     |
| SRB | per year (km2)     | -1.4 (u: -0.5; c: -0.9)     | 0 (u: 0; c: 0)          | -3.6 (u: -0.4; c: -3.2) | -5 (u: -0.9; c: -4.1)     |
|     | % of baseline area | -0.1 (u: 0; c: -0.1)        | 0 (u: 0; c: 0)          | -1.4 (u: -0.2; c: -1.2) | -1.4 (u: -0.2; c: -1.3)   |
| SVK | per year (km2)     | 0.3 (u: -0.7; c: 1)         | 0 (u: 0; c: 0)          | 0 (u: -0.1; c: 0.1)     | 0.3 (u: -0.8; c: 1.1)     |
|     | % of baseline area | 0 (u: -0.1; c: 0.1)         | 0 (u: 0; c: 0)          | 0 (u: -0.1; c: 0.1)     | 0 (u: -0.2; c: 0.1)       |
| SVN | per year (km2)     | -0.6 (u: -0.6; c: 0)        | 0 (u: 0; c: 0)          | 0 (u: -0.1; c: 0)       | -0.6 (u: -0.7; c: 0.1)    |
|     | % of baseline area | -0.1 (u: -0.1; c: 0)        | -1.7 (u: -1.8; c: 0.1)  | -0.1 (u: -0.1; c: 0)    | -1.8 (u: -2; c: 0.2)      |
| SWE | per year (km2)     | -11 (u: -11.6; c: 0.5)      | -1.1 (u: -1.2; c: 0.1)  | -1.1 (u: -1.4; c: 0.3)  | -13.2 (u: -14.1; c: 0.9)  |
|     | % of baseline area | -0.1 (u: -0.1; c: 0)        | -0.3 (u: -0.3; c: 0)    | -0.1 (u: -0.1; c: 0)    | -0.4 (u: -0.4; c: 0)      |
| TUR | per year (km2)     | -115.2 (u: -66.9; c: -48.3) | -4.4 (u: -4; c: -0.4)   | -6.9 (u: -6.1; c: -0.8) | -126.5 (u: -77; c: -49.5) |
|     | % of baseline area | -0.5 (u: -0.3; c: -0.2)     | -1.9 (u: -1.8; c: -0.2) | -0.7 (u: -0.6; c: -0.1) | -3.1 (u: -2.7; c: -0.5)   |

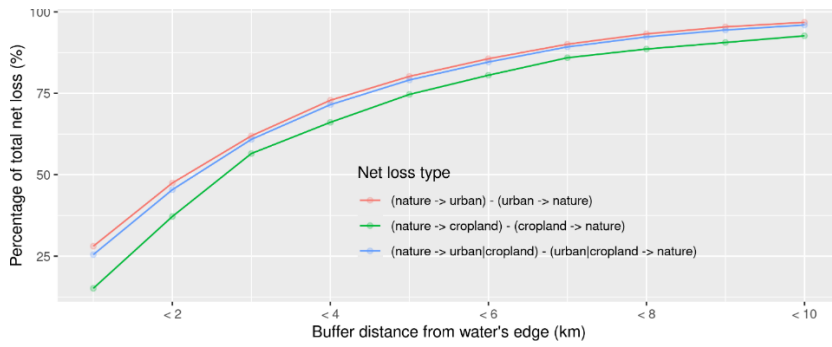

Figure S1. Net loss area percentages of total net loss within buffer distances from the water's edge. Separate lines are plotted for types of net loss including net loss from urban expansion, net loss from cropland expansion, and the combination of the two.

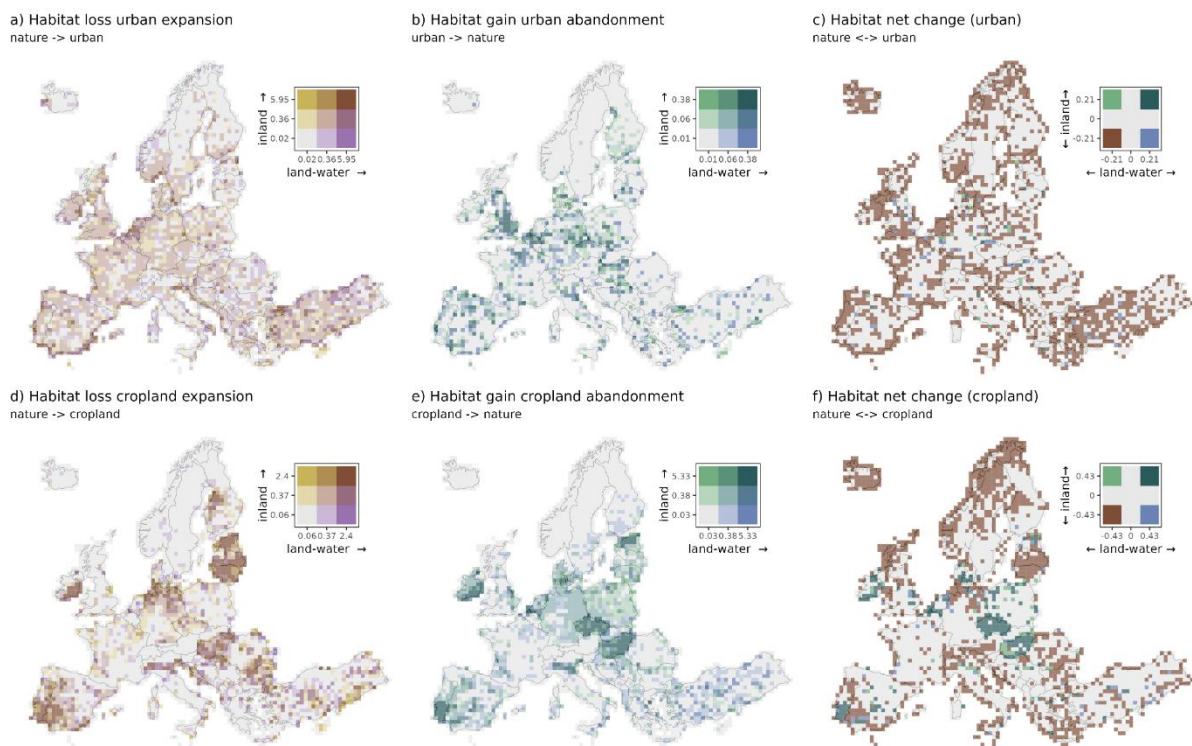

Figure S2. Natural habitat loss (a, d), recovery (b, e) and net change (c, f) from urban and cropland expansion and abandonment patterns. Mapped values represent the area change between 2000 and 2018 as a percentage of baseline natural habitat area per 50km grid cell. Bivariate colour ramps distinguish natural habitat changes within (“land-water”) and outside (“inland”) the riparian/coastal zones for each grid cell. Colour ramps are scaled differently between each plot to highlight spatial hotspots, but not for making magnitudes comparable across maps.
